# Supplementary material
Source: MDPI journal article supplement (https://www.mdpi.com/2076-0760/12/6/352)
Supplement: s1 [file s1]

Supplementary Material

| Conference Preparation Sheet / Goal-setting framework                                         |            |               |                       |
|-----------------------------------------------------------------------------------------------|------------|---------------|-----------------------|
| Goals                                                                                         |            |               |                       |
| Research Questions                                                                            |            |               |                       |
| Areas of Interest                                                                             |            |               |                       |
| Break out sessions                                                                            | Priority 1 | Alternative 2 | Connection(s) to Goal |
| Wednesday (AM)                                                                                |            |               |                       |
| Wednesday (PM)                                                                                |            |               |                       |
| Thursday (AM)                                                                                 |            |               |                       |
| Thursday (PM)                                                                                 |            |               |                       |
| Friday (AM)                                                                                   |            |               |                       |
| Presenters of Interest                                                                        |            |               |                       |
| <ul style="list-style-type: none"><li></li><li></li><li></li><li></li><li></li><li></li></ul> |            |               |                       |

**Figure S1.** Goal-Setting Framework Template. This document was shared with students as a pre-conference planning tool. Students reviewed the schedule of speakers and connected the speakers with their research interest to select which panels they would attend and who the students would like to meet during the conference.
